# Supplementary material
Source: PubMed Central journal article supplement (PMC4036218)
Supplement: supp_kwu067_kwu067supp.pdf [file supp_kwu067_kwu067supp.pdf]

WEB TABLES

Web Table 1 - Characteristics of Participants by Clinic Site, Cardiovascular Health Study, 1996-1997

---

Among all individuals with measured levels of PIIINP

---

|                          | Forsyth County, North Carolina |    | Sacramento County, California <sup>a</sup> |    | Washington County, Maryland <sup>a</sup> |    | Pittsburgh, Pennsylvania |    |
|--------------------------|--------------------------------|----|--------------------------------------------|----|------------------------------------------|----|--------------------------|----|
|                          | N = 700                        |    | N = 765                                    |    | N = 560                                  |    | N = 701                  |    |
|                          | Mean (SD)                      | %  | Mean (SD)                                  | %  | Mean (SD)                                | %  | Mean (SD)                | %  |
| Age                      | 77.5 (4.7)                     |    | 77.9 (5.0)                                 |    | 78.2 (4.7)                               |    | 77.9 (4.5)               |    |
| Male                     |                                | 37 |                                            | 39 |                                          | 35 |                          | 39 |
| BMI (kg/m <sup>2</sup> ) | 26.7 (4.6)                     |    | 27.0 (4.6)                                 |    | 27.3 (4.9)                               |    | 27.0 (4.5)               |    |
| SBP (mmHg)               | 136 (20)                       |    | 140 (20)                                   |    | 137 (21)                                 |    | 134 (20)                 |    |
| PIIINP (μg/L)            | 5.0 (1.8)                      |    | 4.8 (1.7)                                  |    | 4.5 (1.7)                                |    | 4.8 (1.7)                |    |

---

Abbreviations: BMI=body-mass index, PIIINP=procollagen type III N-terminal propeptide, SBP=systolic blood pressure, SD=standard deviation

<sup>a</sup> Transforming growth factor-β was not measured at these sites

Web Table 2 – Hazard Ratios for Cause-Specific Mortality per Doubling of TGF- $\beta$  and PIIINP +/-Adjustment for Additional Variables, Cardiovascular Health Study, 1996-2010 <sup>a</sup>

|                | TGF- $\beta$        |                               |                                  | PIIINP              |                               |                                  |
|----------------|---------------------|-------------------------------|----------------------------------|---------------------|-------------------------------|----------------------------------|
|                | N<br>(deaths/total) | With<br>Adjustment<br>HR (CI) | Without<br>Adjustment<br>HR (CI) | N<br>(deaths/total) | With<br>Adjustment<br>HR (CI) | Without<br>Adjustment<br>HR (CI) |
| NT-proBNP      | 798/1,236           | 1.11<br>(1.02, 1.20)          | 1.12<br>(1.03, 1.21)             | 1,514/2,348         | 1.11<br>(0.99, 1.25)          | 1.11<br>(0.99, 1.25)             |
| TNT            | 798/1,236           | 1.12<br>(1.03, 1.21)          | 1.12<br>(1.03, 1.21)             | 1,514/2,348         | 1.10<br>(0.98, 1.24)          | 1.11<br>(0.99, 1.25)             |
| 2-hour glucose | 662/1,054           | 1.11<br>(1.02, 1.21)          | 1.11<br>(1.02, 1.21)             | 1,235/1,995         | 1.11<br>(0.97, 1.27)          | 1.11<br>(0.97, 1.28)             |
| ACR            | 849/1,285           | 1.10<br>(1.02, 1.19)          | 1.10<br>(1.02, 1.18)             | 1,598/2,388         | 1.11<br>(0.99, 1.25)          | 1.12<br>(1.00, 1.26)             |
| MMSE           | 946/1,443           | 1.10<br>(1.02, 1.18)          | 1.09<br>(1.01, 1.17)             | 1,789/2,726         | 1.12<br>(1.00, 1.24)          | 1.14<br>(1.03, 1.27)             |

Abbreviations: ACR=urine albumin/creatinine ratio, CI=95% confidence interval, HR=hazard ratio,

MMSE=mini mental status exam score, NT-proBNP=N-terminal pro-brain natriuretic peptide,

PIIINP=procollagen type III N-terminal propeptide, TGF- $\beta$ = transforming growth factor- $\beta$ , TNT=troponin-T

<sup>a</sup> Adjusted for age, race, gender, clinic, body-mass index, smoking status, pack years, exercise, alcohol use, marital status, systolic blood pressure, fasting glucose, total cholesterol, C-reactive protein, oral hypoglycemic agents, insulin, statins, hypertension medications, estimated glomerular filtration rate, and depressive symptoms score, +/- additional variable

Web Table 3 – Mutually-adjusted hazard ratios for Total Mortality per Doubling of TGF- $\beta$  and PIIINP, Cardiovascular Health Study, 1996-2010

|                      | N<br>(deaths/total) | TGF- $\beta$ |       |          | PIIINP |       |          |
|----------------------|---------------------|--------------|-------|----------|--------|-------|----------|
|                      |                     | HR           | CI    | <i>P</i> | HR     | CI    | <i>P</i> |
| Model 1 <sup>a</sup> | 917/1,339           | 1.13         | 1.06, | <0.001   | 1.18   | 1.11, | <0.001   |
|                      |                     |              | 1.21  |          |        | 1.25  |          |
| Model 2 <sup>b</sup> | 917/1,339           | 1.11         | 1.03, | 0.004    | 1.17   | 1.10, | <0.001   |
|                      |                     |              | 1.19  |          |        | 1.24  |          |
| Model 3 <sup>c</sup> | 917/1,339           | 1.10         | 1.03, | 0.007    | 1.13   | 1.06, | <0.001   |
|                      |                     |              | 1.18  |          |        | 1.21  |          |

HR=hazard ratio, CI=95% confidence interval, PIIINP=procollagen type III N-terminal propeptide, TGF- $\beta$ =transforming growth factor- $\beta$

<sup>a</sup> Adjusted for age, gender, race, and clinic

<sup>b</sup> Adjusted for age, race, gender, clinic, body-mass index, smoking status, pack years, exercise, alcohol use, marital status, systolic blood pressure, fasting glucose, total cholesterol, C-reactive protein, oral hypoglycemic agents, insulin, statins, and hypertension medications

<sup>c</sup> Adjusted for age, race, gender, clinic, body-mass index, smoking status, pack years, exercise, alcohol use, marital status, systolic blood pressure, fasting glucose, total cholesterol, C-reactive protein, oral hypoglycemic agents, insulin, statins, hypertension medications, estimated glomerular filtration rate, and depressive symptoms score
